# Supplementary material
Source: PubMed Central journal article supplement (PMC2824370)
Supplement: 0906829107_pnas.200906829SI.pdf [file 0906829107_pnas.200906829SI.pdf]

# Supporting Information

Zavaleta et al. 10.1073/pnas.0906829107

Table S1. Results from four ANOVAs examining the effects of species richness and the number of functions considered on the proportion of plots exceeding multifunctionality thresholds of 30–60%

| <i>T</i> | R            | 1998          |           |               |                | 2000           |               |               | 2002           |  |
|----------|--------------|---------------|-----------|---------------|----------------|----------------|---------------|---------------|----------------|--|
|          |              | N             | RxN       | R             | N              | RxN            | R             | N             | RxN            |  |
| 30%      | 0.892 (0.47) | 17.7 (<0.001) | 0.087 (1) | 67.6 (<0.001) | 4.95 (<0.001)  | 0.841 (0.680)  | 5.15 (<0.001) | 55.0 (<0.001) | 0.466 (0.990)  |  |
| 40%      | 1.000 (0.41) | 17.0 (<0.001) | 0.087 (1) | 53.8 (<0.001) | 9.18 (<0.001)  | 0.352 (1.000)  | 4.48 (0.001)  | 65.5 (<0.001) | 1.190 (0.230)  |  |
| 50%      | 0.937 (0.44) | 17.5 (<0.001) | 0.146 (1) | 36.5 (<0.001) | 33.30 (<0.001) | 0.982 (0.490)  | 4.52 (0.001)  | 88.3 (<0.001) | 1.610 (0.024)  |  |
| 60%      | 0.478 (0.75) | 16.4 (<0.001) | 0.216 (1) | 17.8 (<0.001) | 55.30 (<0.001) | 2.950 (<0.001) | 5.93 (<0.001) | 99.1 (<0.001) | 2.860 (<0.001) |  |

Cells report *F* values with associated *P* values in parentheses. *T*, multifunctionality threshold; R, species richness; N, number of functions; RxN, interaction term.
